# Supplementary material for: Nitric Oxide Synthesis Inhibition and Anti-Inflammatory Effect of Polypeptide Isolated from Chicken Feather Meal in Lipopolysaccharide-Stimulated RAW 264.7 Macrophages
Source: PubMed Central journal article supplement — Food Technol Biotechnol. 2019 Jun;57(2):200–12. doi: 10.17113/ftb.57.02.19.5964 (PMC6718961; doi:10.17113/ftb.57.02.19.5964), 2019-06
Supplement: FTB-57-200_S1.pdf [file FTB-57-200_S1.pdf]

**Table S1.** IC<sub>50</sub> values of ultrafiltration fractions of chicken feather meal hydrolyzed by Flavourzyme against NO

| Fraction (M/kDa) | NO radical scavenging activity IC <sub>50</sub> /(μg/mL) |
|------------------|----------------------------------------------------------|
| <0.65            | (3.6±0.3) <sup>a</sup>                                   |
| 0.65-3           | (5.8±0.6) <sup>ab</sup>                                  |
| 3-5              | (7.12±0.5) <sup>b</sup>                                  |
| 5-10             | (10.420.7) <sup>c</sup>                                  |
| >10              | (21.9±0.7) <sup>d</sup>                                  |

Data are presented as mean value±S.D. of three replicates. Different letters indicate significant differences among the groups according to Duncan's test (p≤0.05)

**Table S2.** NO radical scavenging activity of the Sephacryl S-100 fractionation (F<sub>1-4</sub>)

| Fraction       | NO radical scavenging activity IC <sub>50</sub> /(μg/mL) |
|----------------|----------------------------------------------------------|
| F <sub>1</sub> | (73.5±2.8) <sup>b</sup>                                  |
| F <sub>2</sub> | (34.6±3.4) <sup>a</sup>                                  |
| F <sub>3</sub> | Not determined                                           |
| F <sub>4</sub> | Not determined                                           |

Data are presented as mean value±S.D. of three replicates. Different letters indicate significant differences among the groups according to Duncan's test (p≤0.05)

**Table S3.** NO radical scavenging activity of the RP-HPLC (F<sub>2-1</sub> to F<sub>2-5</sub>)

| Fraction         | NO radical scavenging activity IC <sub>50</sub> /(μg/mL) |
|------------------|----------------------------------------------------------|
| F <sub>2-1</sub> | (16.8±1.5) <sup>b</sup>                                  |
| F <sub>2-2</sub> | (15.3±0.7) <sup>a</sup>                                  |
| F <sub>2-3</sub> | (17.4±0.4) <sup>c</sup>                                  |
| F <sub>2-4</sub> | Not determine                                            |
| F <sub>2-5</sub> | (34.0±1.9) <sup>d</sup>                                  |

Data are presented as mean value±S.D. of three replicates. Different letters indicate significant differences among the groups according to Duncan's test (p≤0.05)

**Table S4.** Peptide synthesis derived from the RP-HPLC of F<sub>2-1</sub>, F<sub>2-2</sub>, F<sub>2-3</sub> and F<sub>2-5</sub> and their NO radical scavenging activity

| Peptide sequence | Formula                                                          | M/Da    | Purity/% | NO radical scavenging activity /mM |
|------------------|------------------------------------------------------------------|---------|----------|------------------------------------|
| SNPSVAGVR        | C <sub>36</sub> H <sub>63</sub> N <sub>13</sub> O <sub>13</sub>  | 885.97  | 99.54    | (55.2±0.2) <sup>a</sup>            |
| SLFLHTHSIVADK    | C <sub>67</sub> H <sub>106</sub> N <sub>18</sub> O <sub>19</sub> | 1467.67 | 99.46    | (167.8±0.4) <sup>d</sup>           |
| AVLKKKVTSTFGR    | C <sub>65</sub> H <sub>113</sub> N <sub>19</sub> O <sub>17</sub> | 1434.73 | 98.37    | (109.6±0.2) <sup>c</sup>           |
| LSPWPVKGV        | C <sub>48</sub> H <sub>75</sub> N <sub>11</sub> O <sub>11</sub>  | 982.18  | 97.15    | (87.4±0.4) <sup>b</sup>            |

Data are presented as mean value±S.D. of three replicates. Different letters indicate significant differences among the groups according to Duncan's test (p≤0.05)
